# Supplementary material
Source: Springer Nature journal article supplement (https://www.springermedizin.de/resource/supplementary/12936_2008_793_MOESM1_ESM.pdf/9548938)
Supplement: MOESM1 [file 9548938]

Malawi LD-pattern plot (D')

|           | rs5743836 | rs352139 | rs352140 |
|-----------|-----------|----------|----------|
| rs187085  | 0.14      | 0.88     | 0.28     |
| rs5743836 |           | 0.92     | 0.12     |
| rs352139  |           |          | 0.95     |

Gambia LD-pattern plot (D')

|           | rs5743836 | rs352139 | rs352140 |
|-----------|-----------|----------|----------|
| rs187085  | 0.15      | 0.88     | 0.28     |
| rs5743836 |           | 0.92     | 0.11     |
| rs352139  |           |          | 0.99     |
